# Supplementary material
Source: publisher figshare collection journal article supplement (https://gsapubs.figshare.com/ndownloader/files/23318654)
Supplement: Supplementary file 1 [file 23318654]

## Sheet: MA3
	202.97
	Date Measured		GPS_North (-90-90)	GPS_East (0-360 or -180-180)	Datum
	14/06/2016		DDD.DDDDD	DDD.DDDDD	WGS84
	THICKNESS	LITHOLOGY	GRAIN_SIZE	FEATURES	TOP	BEDFORMS	COLOR	NOTES	SAMPLE	LAYER	d13c	d18o	SAMP_HEIGHT	STRAT_EC
	3.87	si	shl			cur; chn		interbedded current sands and black shales; fluvial deltaic
	2.16	qtz	smd			cur; chn		amalgamated
	0.77	si	shl			cur; chn		interbedded sands and black shales
	1.36	qtz	sfn			cur; chn
	0.1	ls	grn				brown
	0.09	si	shl				black
	0.18	ls	grn	skl
	1.47	si	shl				black
	0.55	qtz	sfn	skl
	0.14	si	shl				black
	0.02	ls	grn
	0.43	si	shl				black
	0.02	ls	oo
	0.32	si	shl				black
	0.21	ls	gcs	sf; skl		fnlam		recessive
	0.24	ls	gcs	skl		mas		fossil mania
	0.3	ls	gfn	skl		sup		ribbony texture
	0.19	ls	gcs	skl		sup
	2.2	COVER	COVER
	5.05	si	shl				olive	1-3cm horizons of carbonate concretions
	0.32	ls	gcs	skl			mas
	0.34	si	shl					interbedded with silt
	0.08	ls	gfn	skl		sup
	1.59	COVER	COVER
	0.5	si	shl				grey
	7.1	COVER	COVER
	2.12	si	shl				blue-grey
	0.25	qtz	sfn	skl; vug		bio
	0.33	COVER	COVER
	0.06	qtz	sfn
	7.02	COVER	COVER
	0.22	si	shl				grey
	0.32	qtz	sfn	skl
	6.05	COVER	COVER
	0.51	ls	gfn
	1	COVER	COVER
	0.15	ls	gfn	sf
	2.78	COVER	COVER
	0.95	ls	mic
	18.89	COVER	COVER
0.1	1.07	si	shl				olive
	0.69	ls	mic
	0.08	ls	mic	vug
	0.09	si	shl				grey
	0.1	ls	mic	vug; shll
	0.12	si	shl				grey
	0.25	ls	gfn	shll			grey
	0.37	si	shl				grey
	0.18	ls	rib				brown
	0.18	si	shl				grey
	0.31	ls	rib				black	oily bed, pyrites, grainstone lenses
	1.07	COVER	COVER
	0.04	ls	grn	shll		brc	brown
	0.84	COVER	COVER
	0.18	ls	grn	cg; skl
	0.25	COVER	COVER
	0.16	ls	mic		crk			mud cracks filled with mudchip breccia
	0.3	COVER	COVER
	0.31	ls	mic				grey	silicified stroms on top
	2.34	COVER	COVER
	2.13	si	shl				olive
	1.35	ls	rib					starved ls grn ripples
	7	COVER	COVER
	1.01	ls	rib	cg; skl	crk
	1.9	si	shl				grey
	3.3	COVER	COVER
	1.1	si	shl				grey
	0.08	ls	wck	shll			grey	cerithids
	1.26	si	shl				grey	carbonate nodules
	0.19	ASH	ASH
	0.22	ls	rib		crk		grey
	0.07	ASH	ASH
	0.11	ls	rib		crk		grey
	3.34	si	shl				grey	interbedded vuggy wackestone beds
	0.08	ls	mic		crk			oily
	0.72	si	shl				grey
	0.25	ls	gfn	shll
	0.06	ASH	ASH
	0.08	ls	mic		crk
	0.9	si	shl				grey
	0.14	ls	mic				grey
-0.01	0.07	COVER	COVER
	0.51	ls	rib					starved ripples
	2.28	COVER	COVER
	0.3	si	shl				olive
	0.6	ASH	ASH
	0.1	si	shl				green
0.06	0.41	COVER	COVER
	0.18	ls	mic				brown
	0.22	ls	grn	cg
	6.3	si	shl				grey
-0.01	0.18	ls	rib				grey
-0.06	1.58	si	shl				grey
	0.14	ls	rib				grey
	0.08	si	shl
	0.05	ls	pck		crk		grey
	0.81	si	shl	worm			grey
	0.04	ls	wck				grey
	0.34	si	shl				grey
	0.02	ls	pck				grey
	0.38	si	shl				grey
	0.07	ls	gfn			brc
	0.19	si	shl				grey
	0.04	ls	mic				grey
	0.45	si	shl				grey
	0.21	ls	rib		crk		grey
	2.78	COVER	COVER
	0.77	si	shl				grey
	0.05	ls	wck	shll
	0.02	si	shl				white
	0.07	ls	wck				grey
	0.02	ASH	ASH
	0.06	ls	wck				grey
	0.02	si	shl				white
	0.04	ls	wck				grey
	0.08	si	shl				white
	0.34	ls	wck				grey
	0.31	si	shl				grey
	0.16	ls	gfn					pelloids? Ton of worm poop
	0.08	si	shl				grey
	0.05	ls	gfn					pelloids
	0.34	si	shl				white
	0.06	ls	wck				grey
	0.87	si	shl				olive
	0.42	ls	rib	mc			grey
	0.25	ls	mic					wck lenses
	1.13	ls	rib		crk	brc	black	oily
	1.85	si	shl				olive	iw ls rib
	1.52	si	shl				olive
	0.2	ls	strm				orange	cauliform
	0.26	si	shl				grey
	1.34	si	shl				olive	iw ls grn/rib
	1.62	ls	rib		crk	brc	black	ferruginized top
	0.41	si	shl				olive	iw ls wck
	1.02	COVER	COVER
	1.27	si	shl				olive
	4.36	si	shl				olive	iw ls grn
	0.07	ls	rib			brc	grey
	1.42	si	shl				olive
	0.94	ls	rib				black
	1.42	si	shl				olive
	0.06	ls	gmd			trg	grey
	0.45	si	shl
	0.49	ls	grn			mas
	0.99	si	shl				olive
	0.78	ls	grn	mc			grey
	0.24	si	shl
0.3	1.45	ls	grn			trg	black	cut/fill scours
	1.28	COVER	COVER
	4.55	ls	grn			trg	black	cut/fill scours
	0.81	si	shl				grey
	1.43	ls	grn		crk	pln	black
	0.12	si	shl				grey
	0.17	ls	gfn				grey	silty
	0.31	si	shl				grey	coarsening up
	0.46	ls	rib				grey	silty, recessive
	0.42	ls	rib				grey
	0.38	ls	grn				grey	chert
	0.6	si	slt				grey	iw ls wck/rib
	2	ls	rib				black
	0.07	si	shl				grey
	0.12	ls	rib				black
	0.11	si	shl				grey
	0.17	ls	rib				black
	0.03	si	shl				grey
	1.8	ls	rib		crk	pln	black	chert
	0.25	ls	rib		crk		black	chert
	0.31	ls	mic		crk		grey
	0.55	si	slt				grey	iw ls rib; pyrites and chert
	0.08	SHEAR	SHEAR
	0.25	ls	rib				black	chert
	0.51	si	shl				black
	0.2	si	shl				green	paleosol?
	0.74	ls	rib				black	iw si shl
	0.65	ls	rib		crk		black	chert
	0.32	si	shl				green
	0.05	ls	rib				brown
	0.24	si	shl				green
	0.29	ls	rib				green
	1.52	si	shl				green
	0.16	si	slt				green
	0.38	si	shl				green
	0.18	ls	rib					silty
	0.04	si	shl				green
	0.26	ls	rib				black
	0.32	si	shl				green
	0.31	ls	rib				black	platy
	1.54	ls	rib		crk	pln	black	chert
	0.21	si	shl				green	paleosol?
0.14	0.07	ls	rib					silty
	0.02	si	shl				green
	0.51	si	slt				grey
	0.81	ls	rib		crk		black
	0.88	ls	rib		crk	pln	grey
	0.41	si	shl				green
	0.63	ls	rib				grey
	0.59	ls	rib				grey	silty
	0.49	ls	rib			pln	black
	0.05	si	shl				grey
	0.7	ls	rib		crk		grey
	1.95	si	shl				green	coarsening up
	3.57	si	shl				green	coarsening up
	2	ls	rib		crk		grey
	1.3	si	slt				grey
	0.05	ls	rib				grey
	1.14	si	slt				grey	iw ls rib
	1.69	si	slt				grey
	0.22	ls	rib			brc	grey
	1.01	si	slt				grey
	0.02	ls	rib				grey
	0.7	si	slt				grey	coarsening up
	0.1	ls	rib				grey
	4.9	si	slt				grey
	0.23	si	slt	vug			grey
	0.17	si	slt	vug			yellow	iw qtz sfn; base of Santa Lucia
	0.11	qtz	sfn					iw si shl
	2.14	si	shl				red	rhizoliths?
	1.7	si	shl				red
